# Supplementary material for: Spectral overlap-free quantum dot-based determination of benzo[a]pyrene-induced cancer stem cells by concurrent monitoring of CD44, CD24 and aldehyde dehydrogenase 1
Source: Royal Society of Chemistry journal article supplement (doi:10.1039/c4cc08953g), 2014-12-23
Supplement: c4cc08953g1.pdf [file c4cc08953g1.pdf]

Table 1. Absorbance of BPDE adducts formed in MCF-7 cells at 346nm. Relation of absorbance (A), extinction coefficient ( $\epsilon$ ), concentration (c), and path length (l) is written with the following equation:  $A = \epsilon cl$ . ( $\epsilon = 29,000 \text{ M}^{-1} \text{ cm}^{-1}$ ,  $l = 1 \text{ cm}$ ).

|                                | set      | BPDE absorbance | Absorbance average  | BPDE concentration               |
|--------------------------------|----------|-----------------|---------------------|----------------------------------|
| <b>Control</b>                 | <b>1</b> | 0               | 0                   | 0                                |
|                                | <b>2</b> | 0               |                     |                                  |
|                                | <b>3</b> | 0               |                     |                                  |
| <b>BP 0.2<math>\mu</math>M</b> | <b>1</b> | 0.004           | 0.0033 $\pm$ 0.001  | 1.14 $\times$ 10 <sup>-7</sup> M |
|                                | <b>2</b> | 0.0021          |                     |                                  |
|                                | <b>3</b> | 0.0037          |                     |                                  |
| <b>BP 2<math>\mu</math>M</b>   | <b>1</b> | 0.0155          | 0.0125 $\pm$ 0.0034 | 4.31 $\times$ 10 <sup>-7</sup> M |
|                                | <b>2</b> | 0.00889         |                     |                                  |
|                                | <b>3</b> | 0.0132          |                     |                                  |
| <b>BP 5<math>\mu</math>M</b>   | <b>1</b> | 0.0321          | 0.0314 $\pm$ 0.0052 | 1.08 $\times$ 10 <sup>-6</sup> M |
|                                | <b>2</b> | 0.0259          |                     |                                  |
|                                | <b>3</b> | 0.0363          |                     |                                  |
| <b>BP 10<math>\mu</math>M</b>  | <b>1</b> | 0.0356          | 0.0359 $\pm$ 0.0023 | 1.24 $\times$ 10 <sup>-6</sup> M |
|                                | <b>2</b> | 0.0338          |                     |                                  |
|                                | <b>3</b> | 0.0384          |                     |                                  |
